# Supplementary material
Source: publisher figshare collection journal article supplement (https://frontiersin.figshare.com/ndownloader/files/14915384)
Supplement: Supplementary file [file 14915384]

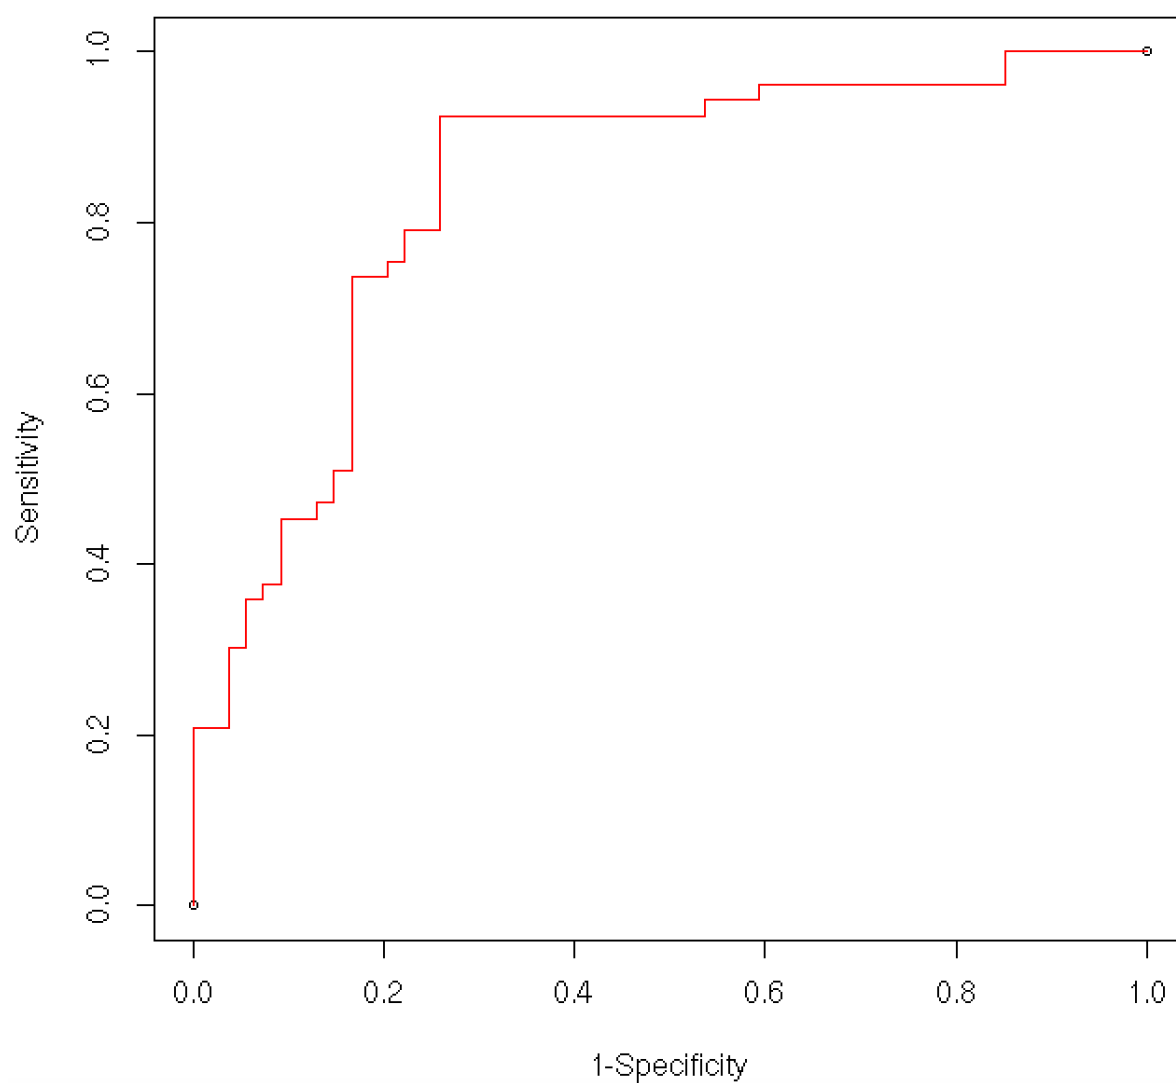

Figure 2: ROC Curve of multivariate model to discriminate NP from NNP
